# Supplementary material for: Progressive attenuation of visual global precedence across healthy aging and Alzheimer’s disease
Source: Frontiers journal article supplement (doi:10.3389/fnagi.2022.893818), 2022-09-20
Supplement: Data_Sheet_1.pdf [file Data_Sheet_1.pdf]

## Supplementary\_Material\_Studies 1 & 2\_Discrimination sensitivity

### Section 2.2. Analyses of $d'$

Table 2.2.a. Hit and false alarm (FA) probabilities for each group in the different experimental conditions in Study 1.

| Group<br>(N) | Task   | Congruency  | Hit prob.  | FA prob.    |
|--------------|--------|-------------|------------|-------------|
| HE<br>(26)   | Global | Congruent   | .97 (.039) | .018 (.022) |
|              |        | Incongruent | .87 (.22)  | .043 (.071) |
|              |        | Control     | .99 (.001) | .016 (.022) |
|              | Local  | Congruent   | .98 (.023) | .013 (.018) |
|              |        | Incongruent | .82 (.27)  | .10 (.20)   |
|              |        | Control     | .96 (.07)  | .025 (.048) |
| MCI<br>(21)  | Global | Congruent   | .98 (.030) | .024 (.049) |
|              |        | Incongruent | .84 (.29)  | .14 (.29)   |
|              |        | Control     | .99 (.001) | .068 (.19)  |
|              | Local  | Congruent   | .98 (.032) | .018 (.035) |
|              |        | Incongruent | .76 (.33)  | .080 (.12)  |
|              |        | Control     | .96 (.051) | .024 (.042) |
| AD<br>(26)   | Global | Congruent   | .91 (.20)  | .038 (.057) |
|              |        | Incongruent | .69 (.39)  | .23 (.34)   |
|              |        | Control     | .99 (.001) | .15 (.26)   |
|              | Local  | Congruent   | .95 (.10)  | .039 (.081) |
|              |        | Incongruent | .80 (.30)  | .092 (.17)  |
|              |        | Control     | .92 (.14)  | .022 (.040) |

*Note:*  $\pm 1.96 \cdot \text{SD}$  of the mean is shown in parentheses. HE (healthy elderly), MCI (Mild Cognitive Impairment), AD (Alzheimer's disease). Note that the control condition was not considered for calculating  $d'$ , however it did indicate an appropriate level of attention and ability of participants for the tasks [Mean Hit probability: .97 (range: .92-.99); Mean FA probability: .05 (range: .022-.15)].

## Section 5.2. Change over time index ( $I_{1-2}$ )

Table 5.2.b. Hit and false alarm (FA) probabilities for each group in the different experimental conditions in Study 2.

| Group<br>(N)  | Task   | Congruency  | Hit prob.  | FA prob.    |
|---------------|--------|-------------|------------|-------------|
| HE<br>(9)     | Global | Congruent   | .89 (.12)  | .093 (.083) |
|               |        | Incongruent | .78 (.25)  | .18 (.26)   |
|               |        | Control     | .93 (.082) | .12 (.11)   |
|               | Local  | Congruent   | .84 (.30)  | .20 (.25)   |
|               |        | Incongruent | .78 (.26)  | .17 (.30)   |
|               |        | Control     | .83 (.32)  | .16 (.29)   |
| MCI<br>(5)    | Global | Congruent   | .92 (.11)  | .066 (.084) |
|               |        | Incongruent | .79 (.17)  | .25 (.32)   |
|               |        | Control     | .90 (.13)  | .13 (.21)   |
|               | Local  | Congruent   | .87 (.10)  | .12 (.12)   |
|               |        | Incongruent | .83 (.15)  | .22 (.31)   |
|               |        | Control     | .90 (.087) | .19 (.24)   |
| MCI/AD<br>(4) | Global | Congruent   | .96 (.066) | .049 (.078) |
|               |        | Incongruent | .79 (.26)  | .16 (.30)   |
|               |        | Control     | .99 (.001) | .01 (.001)  |
|               | Local  | Congruent   | .99 (.001) | .001 (.001) |
|               |        | Incongruent | .73 (.23)  | .058 (.055) |
|               |        | Control     | .90 (.11)  | .01 (.001)  |
| AD<br>(11)    | Global | Congruent   | .92 (.11)  | .18 (.21)   |
|               |        | Incongruent | .48 (.37)  | .41 (.36)   |
|               |        | Control     | .91 (.11)  | .24 (.32)   |
|               | Local  | Congruent   | .85 (.14)  | .065 (.083) |
|               |        | Incongruent | .93 (.11)  | .088 (.086) |
|               |        | Control     | .89 (.15)  | .089 (.17)  |

Note:  $\pm 1.96 \cdot SD$  of the mean is shown in parentheses. HE (healthy elderly), MCI (Mild Cognitive Impairment), MCI/AD (participants with MCI who progressed to probable AD), AD (Alzheimer's disease). Note that the control condition was not considered for calculating  $d'$ , however it did indicate an appropriate level of attention and ability of participants for the tasks [Mean Hit probability: .91 (range: .83-.99); Mean FA probability: .12 (range: .01-.24)].

Table 5.2.c. Estimated mean values and results of pairwise comparisons for *Group x Congruency x Task* comparing the  $I_{1-2} d'$  index between global and local tasks.

| Group  | Congruency  | <i>M</i><br>Global | <i>M</i><br>Local | <i>F</i> ( <i>df1</i> , <i>df2</i> ) | <i>p</i> ( $\eta^2$ ) |
|--------|-------------|--------------------|-------------------|--------------------------------------|-----------------------|
| HE     | Congruent   | 1.42<br>± .78      | 2.53<br>± .78     | 1.09 (1, 69)                         | .30 (.016)            |
|        | Incongruent | 1.53<br>± .78      | 1.43<br>± .78     | .009 (1, 69)                         | .93 (< .005)          |
| MCI    | Congruent   | 1.39<br>±1.05      | 2.47<br>±1.05     | .58 (1, 69)                          | .44 (.008)            |
|        | Incongruent | 1.39<br>±1.95      | -.012<br>±1.05    | .97 (1, 69)                          | .33 (.014)            |
| MCI/AD | Congruent   | 1.12<br>±1.35      | -.38<br>±1.17     | .75 (1, 74)                          | .39 (.010)            |
|        | Incongruent | 2.44<br>±1.35      | .34<br>±1.17      | 1.48 (1, 74)                         | .23 (.20)             |
| AD     | Congruent   | 1.76<br>± .74      | 1.48<br>± .71     | .08 (1, 71)                          | .78 (< .005)          |
|        | Incongruent | 2.01<br>± .78      | -.48<br>± .71     | 5.97 (1, 72)                         | <b>.018* (.076)</b>   |

*Note:* ±1.96·SE of the mean is shown under each value. \*: Statistically significant differences ( $p < .05$ ) are highlighted in bold. Note that a negative value reflects an improvement in task performance, whereas a positive value reflects a worsening after one year. HE (healthy elderly), MCI (Mild Cognitive Impairment), MCI/AD (participants with MCI who progressed to probable AD), AD (Alzheimer's disease).
